# Supplementary material
Source: Research Square preprint supplement (doi:10.21203/rs.3.rs-8922730/v1)
Supplement: Supplementary file 1 [file 43e8fd3d2ad4e6e1f87e1149.xlsx]

## Sheet: Table S3
Supplementary Table S3. Paired Bootstrap Comparison of C-indices Between CTI-based and TyG-based Metabolic Indices
Group	Comparison	Index 1	Index 2	C-index 1	C-index 2	ΔC	95% CI Lower	95% CI Upper	P-value	N	Events
NGT	CTI-WHtR vs TyG-WHtR	CTI-WHtR	TyG-WHtR	0.6318	0.6271	0.0047	-0.0005	0.013	0.076	2854	542
NGT	CTI-WC vs TyG-WC	CTI-WC	TyG-WC	0.6353	0.6296	0.0057	0	0.0144	0.05	2854	542
NGT	CTI-BMI vs TyG-BMI	CTI-BMI	TyG-BMI	0.6327	0.6267	0.006	-0.0011	0.0162	0.116	2854	542
NGT	CTI vs TyG	CTI	TyG	0.632	0.6267	0.0052	-0.0007	0.0146	0.09	2854	542
Prediabetes	CTI-WHtR vs TyG-WHtR	CTI-WHtR	TyG-WHtR	0.6276	0.6272	0.0004	-0.0014	0.0023	0.778	3041	654
Prediabetes	CTI-WC vs TyG-WC	CTI-WC	TyG-WC	0.6277	0.6272	0.0005	-0.0012	0.0026	0.672	3041	654
Prediabetes	CTI-BMI vs TyG-BMI	CTI-BMI	TyG-BMI	0.6279	0.6275	0.0004	-0.0019	0.0034	0.758	3041	654
Prediabetes	CTI vs TyG	CTI	TyG	0.6279	0.6276	0.0003	-0.002	0.0037	0.79	3041	654
T2D	TyG-WHtR vs CTI-WHtR	TyG-WHtR	CTI-WHtR	0.651	0.6492	0.0018	-0.0032	0.0091	0.528	953	248
T2D	TyG-WC vs CTI-WC	TyG-WC	CTI-WC	0.6544	0.6518	0.0025	-0.0042	0.0112	0.48	953	248
T2D	TyG-BMI vs CTI-BMI	TyG-BMI	CTI-BMI	0.651	0.6496	0.0014	-0.0042	0.0101	0.628	953	248
T2D	TyG vs CTI	TyG	CTI	0.6518	0.6503	0.0015	-0.0051	0.0108	0.726	953	248
Bootstrap resampling B = 1,000 (seed = 2024). 95% CI by percentile method.
ΔC = C-index of Index 1 minus C-index of Index 2. Positive ΔC favors Index 1.
In NGT: CTI-based indices listed first (favored). In T2D: TyG-based indices listed first (favored).
Model 3: fully adjusted (age, sex, smoking, alcohol, education, marital status, residence, hypertension, LDL-C, HDL-C, lipid-lowering medication, CKD, BMI).
Note: C-index values and sample sizes in this table are consistent with those reported in Table 4 (C-index column). Model 3 HRs in Tables 2 and 4 are based on slightly larger samples (NGT n=2,891; Prediabetes n=3,090; T2D n=966), which include participants with missing data on smoking, education, or residence that are excluded here via listwise deletion.
