# Supplementary material
Source: Research Square preprint supplement (doi:10.21203/rs.3.rs-8922730/v1)
Supplement: Supplementary file 2 [file 5b037e6f55191347dcf0ebd5.xlsx]

## Sheet: Table S5 RCS Summary
Additional file 5 (Table S5). Summary of RCS Dose–Response Analyses for CTI-WHtR by Glycemic Status
(Merged from former Table S4 and Table S6; N(KM) and Events(KM) columns retained for cross-reference with Kaplan–Meier data)
Group	Endpoint	N (RCS)	N (KM)	Events (RCS)	Events (KM)	Knots	P overall	P non-linearity	Dose–Response Shape	Reference Value (Median)	Peak HR Region	Cox M3 HR per SD (95% CI), P
NGT	MACCE	2884	2916	547	547	4	0.007	0.579	Linear (monotonic ↑)	2.32	HR increases monotonically	1.26 (1.11–1.43), P=0.0003
NGT	Heart Disease	2884	2916	426	426	4	0.027	0.26	Linear (monotonic ↑)	2.32	HR increases monotonically	1.20 (1.04–1.39), P=0.013
NGT	Stroke	2884	2916	170	170	4	0.001	0.716	Linear (monotonic ↑)	2.32	Steepest slope	1.71 (1.37–2.14), P<0.0001
NGT	All-Cause Death	2884	2916	301	305	4	0.042	0.99	Linear (monotonic ↑)	2.32	HR increases monotonically	1.28 (1.07–1.53), P=0.008
Prediabetes	MACCE	3077	3106	661	668	4	0.457	0.404	Flat / NS	2.53	HR ≈ 1.0; wide CI	1.04 (0.94–1.16), P=0.43
Prediabetes	Heart Disease	3077	3106	482	488	4	0.597	0.394	Flat / NS	2.53	HR ≈ 1.0; wide CI	1.01 (0.89–1.14), P=0.92
Prediabetes	Stroke	3077	3106	254	255	4	0.133	0.339	Marginal upward (NS)	2.53	Weak upward trend	1.22 (1.03–1.45), P=0.025
Prediabetes	All-Cause Death	3077	3106	332	333	4	0.002	0.568	Linear (monotonic ↑)	2.53	Significant linear increase	1.33 (1.14–1.56), P=0.0004
T2D	MACCE	963	971	252	252	4	0.034	0.017	Inverted-U (non-linear) ∩	2.79	Peak ≈ 3.0; HR declines	1.12 (0.95–1.32), P=0.17
T2D	Heart Disease	963	971	177	177	4	0.575	0.372	Flat / NS	2.79	HR ≈ 0.8–1.0	1.04 (0.85–1.26), P=0.72
T2D	Stroke	963	971	104	104	4	0.043	0.017	Inverted-U (non-linear) ∩	2.79	Peak ≈ 3.0; steep decline	1.08 (0.85–1.39), P=0.53
T2D	All-Cause Death	963	971	145	148	4	0.002	0.023	Inverted-U (non-linear) ∩	2.79	Peak ≈ 3.0–3.2; decline	1.26 (1.02–1.56), P=0.032
This table integrates former Table S4 (RCS non-linearity tests) and Table S6 (RCS dose–response summary) into a single comprehensive table.
RCS: 4 knots at 5th, 35th, 65th, 95th percentiles (3 df). Model 3: fully adjusted including BMI.
P overall: overall association test. P non-linearity: departure from linearity test. Bold red P = P < 0.05.
N(KM) and Events(KM) columns show Kaplan–Meier analysis sample sizes for cross-reference; minor differences from N(RCS) and Events(RCS) arise from complete-case handling by the rms package.
Green = significant linear; Red = significant non-linear; Yellow = marginal trend; Gray = NS.
Key finding: NGT shows consistent linear associations; T2D shows inverted-U non-linearity for MACCE, Stroke, and Death.
Data source: CHARLS 2011–2020, N = 6,993.
Note: N(RCS) sample sizes (NGT n=2,884; Prediabetes n=3,077; T2D n=963) differ slightly from the primary Cox regression sample sizes in Table 2 (NGT n=2,891; Prediabetes n=3,090; T2D n=966) due to additional listwise deletion by the rms package during restricted cubic spline fitting.
