# Supplementary material
Source: Research Square preprint supplement (doi:10.21203/rs.3.rs-8922730/v1)
Supplement: Supplementary file 3 [file b1b836915c0a2c9630c856c9.xlsx]

## Sheet: Table S4 KM Summary
Additional file 4 (Table S4). Summary of Kaplan–Meier Survival Curve Data by CTI-WHtR Quartiles and Glycemic Status
Group	Endpoint	n	Events	Event Rate	Q1 Events/n (%)	Q2 Events/n (%)	Q3 Events/n (%)	Q4 Events/n (%)	Log-rank P	Curve Separation Pattern
NGT	MACCE	2916	547	18.8%	107/729 (14.7%)	108/729 (14.8%)	149/729 (20.4%)	183/729 (25.1%)	<0.001	Q4 clearly separated below Q1–Q3; dose–response evident
NGT	Heart Disease	2916	426	14.6%	86/729 (11.8%)	88/729 (12.1%)	115/729 (15.8%)	137/729 (18.8%)	<0.001	Q4 clearly separated; graded dose–response
NGT	Stroke	2916	170	5.8%	26/729 (3.6%)	27/729 (3.7%)	46/729 (6.3%)	71/729 (9.7%)	<0.001	Q3–Q4 well separated from Q1–Q2
NGT	All-Cause Death	2916	305	10.5%	71/729 (9.7%)	76/729 (10.4%)	79/729 (10.8%)	79/729 (10.8%)	0.893	All four curves overlapping; no separation
Prediabetes	MACCE	3106	668	21.5%	121/777 (15.6%)	166/776 (21.4%)	179/776 (23.1%)	202/777 (26.0%)	<0.001	Q4 below others, but NS after Model 3 adjustment
Prediabetes	Heart Disease	3106	488	15.7%	91/777 (11.7%)	126/776 (16.2%)	132/776 (17.0%)	139/777 (17.9%)	0.006	Mild separation; Q4 slightly lower
Prediabetes	Stroke	3106	255	8.2%	36/777 (4.6%)	64/776 (8.2%)	67/776 (8.6%)	88/777 (11.3%)	<0.001	Q3–Q4 clearly separated from Q1
Prediabetes	All-Cause Death	3106	333	10.7%	91/777 (11.7%)	77/776 (9.9%)	80/776 (10.3%)	85/777 (10.9%)	0.704	All four curves overlapping; no separation
T2D	MACCE	971	252	26.0%	39/243 (16.0%)	60/243 (24.7%)	65/242 (26.9%)	88/243 (36.2%)	<0.001	Q4 clearly below Q1; wide CIs due to small n
T2D	Heart Disease	971	177	18.2%	30/243 (12.3%)	39/243 (16.0%)	47/242 (19.4%)	61/243 (25.1%)	0.003	Q3–Q4 below Q1–Q2
T2D	Stroke	971	104	10.7%	14/243 (5.8%)	28/243 (11.5%)	28/242 (11.6%)	34/243 (14.0%)	0.029	Mild separation; wide CIs due to small n
T2D	All-Cause Death	971	148	15.2%	34/243 (14.0%)	38/243 (15.6%)	46/242 (19.0%)	30/243 (12.3%)	0.186	Trend toward separation but NS
This table replaces Figure S1 (Kaplan–Meier survival curves) and provides the underlying numerical data.
KM curves used within-group CTI-WHtR quartiles; Q1 (lowest) as reference. Log-rank P values are unadjusted.
Bold red P = significant (P < 0.05); gray = non-significant.
All-cause death: NS log-rank P in all groups, yet Cox Model 3 (continuous per-SD) yielded significant HRs — see Discussion for explanation.
Data source: CHARLS 2011–2020, N = 6,993, mean follow-up 8.0 ± 2.0 years.
