# Supplementary material
Source: Research Square preprint supplement (doi:10.21203/rs.3.rs-8922730/v1)
Supplement: Supplementary file 5 [file e075068a374778d7a4e04b64.docx]

**Additional file 6: Extended Discussion**

*Metabolic Status Modifies the Predictive Value of the C-reactive Protein–Triglyceride–Glucose Index–Waist-to-Height Ratio for Major Adverse Cardiovascular and Cerebrovascular Events: A Prospective Cohort Study from CHARLS*

Xuanzhe Li, Tingmin Li, Yitong Meng, Lishuang Zhang, Gen Yan*

**Overview**

This supplementary file contains extended discussion content that was condensed from the main manuscript Discussion section. Three topics are elaborated: (1) detailed implications of the inverted-U-shaped dose–response in the T2D group, (2) extended analysis of the missing data mechanism and selection bias, and (3) additional methodological considerations regarding Kaplan–Meier/RCS discordance and statistical interpretation.

**1. Extended Discussion of the Inverted-U-Shaped Dose–Response in the T2D Group**

The inverted-U-shaped dose–response pattern observed in the T2D group carries three important implications.

First, it reframes the interpretation of the non-significant per-SD hazard ratios in the T2D group (MACCE HR 1.12, P = 0.17; stroke HR 1.08, P = 0.53): these likely do not reflect the absence of an association, but rather the mathematical artifact of fitting a linear model to a genuinely non-linear relationship—the upward and downward limbs of the inverted-U partially cancel each other, yielding a falsely attenuated linear slope.

Second, it suggests the existence of a “risk saturation threshold” in the diabetic population, beyond which further metabolic deterioration captured by CTI-WHtR paradoxically fails to confer additional cardiovascular risk. This threshold may reflect survivor bias (individuals with the highest metabolic burden who survived to study enrollment may represent a phenotypically resilient subpopulation), a ceiling effect in cardiovascular risk (where competing comorbidities dominate prognosis regardless of metabolic index values), or treatment effects (those with the most extreme CTI-WHtR values may be more likely to receive aggressive pharmacotherapy that partially mitigates cardiovascular risk).

Third, and most broadly, this finding demonstrates that metabolic status modifies not only the magnitude of the biomarker–outcome association but also its functional form—a dimension of effect modification that cannot be detected by standard interaction terms in linear Cox models, and which has been largely unrecognized in the metabolic index literature. Future studies employing non-linear modeling strategies across metabolic strata may reveal similar dose–response transformations for other composite indices (TyG-WHtR, TyG-BMI, etc.) and help identify clinically meaningful risk thresholds.

**2. Extended Discussion of Missing Data Mechanism and Selection Bias**

The missing data mechanism in CHARLS is unlikely to be missing completely at random (MCAR), as participants who did not provide blood samples may differ systematically from those who did. Additional file 2: Table S2 reveals that the included sample was metabolically healthier: included participants had substantially lower CRP (1.55 vs. 4.67 mg/L, SMD = 0.418), lower triglycerides (121.77 vs. 154.62 mg/dL, SMD = 0.301), higher HDL-cholesterol (52.15 vs. 48.89 mg/dL, SMD = 0.214), and lower fasting glucose (107.94 vs. 113.85 mg/dL, SMD = 0.159). The included sample also had a higher proportion of rural residents (82.9% vs. 70.8%, SMD = 0.287), higher educational attainment in the lower categories (SMD = 0.194), and lower prevalence of self-reported hypertension (20.8% vs. 27.0%, SMD = 0.144) and lipid-lowering medication use (3.2% vs. 5.2%, SMD = 0.100). Importantly, all baseline CVD was by design confined to the excluded group (heart disease: 0% vs. 19.5%; stroke: 0% vs. 3.9%), as history of heart disease or stroke was an exclusion criterion.

The lower CRP and triglyceride levels in the included sample suggest that participants who completed blood draws may have been systematically healthier, which could limit generalizability to populations with higher inflammatory or metabolic burden. However, the missingness is plausibly missing at random (MAR) conditional on observed covariates, as the decision to provide blood samples in CHARLS was primarily influenced by logistics (availability of phlebotomy teams at survey sites, participant accessibility) and participant willingness—factors correlated with observable characteristics such as age, urban/rural residence, and education level rather than with the outcome itself. Reassuringly, demographic variables showed negligible imbalances (age: SMD = 0.044; sex: SMD = 0.059; marital status: SMD = 0.049), suggesting that the selection process was primarily driven by logistic factors. Although our complete case sensitivity analysis yielded virtually identical results (NGT: HR 1.27 vs. 1.26), multiple imputation was not performed due to the complexity of the stratified analytical framework. Future studies with more complete ascertainment or formal multiple imputation would strengthen these findings.

**3. Additional Methodological Considerations**

Kaplan–Meier and RCS discordance. The Kaplan–Meier survival data and restricted cubic spline dose–response analyses are presented in Additional files (Tables S4–S5) but were not incorporated into the main text due to space constraints. The KM data used unadjusted within-group CTI-WHtR quartiles and log-rank tests, whereas the primary Cox analyses employed continuous per-SD exposures with full covariate adjustment; consequently, some endpoints (notably all-cause death) showed non-significant log-rank P-values despite significant adjusted HRs in the Cox model, reflecting the greater statistical power of continuous exposure modeling and the impact of covariate adjustment (particularly for age). In addition, RCS complete-case sample sizes (Table S5) were marginally smaller than Cox Model 3 (e.g., NGT: 2,884 vs. 2,891), reflecting minor differences in handling missing covariates in the rms package; this did not materially affect the results.

Interpretation of overall interaction P-values. The overall interaction P-values (0.056–0.071) did not reach the conventional 0.05 threshold. The three-group omnibus interaction test has inherently lower statistical power than pairwise comparisons when group sizes are unbalanced (NGT n = 2,916 vs. T2D n = 971), and a larger study is needed to definitively confirm these interactions. However, the convergence of consistent directional patterns across all four endpoints, statistically significant pairwise comparisons, and biologically plausible mechanistic explanations collectively supports the interpretation of genuine effect modification.

Interpretation of bootstrap C-index comparisons. Paired bootstrap comparisons of C-indices between matched CTI and TyG index pairs confirmed the directional consistency of the group-switching phenomenon but did not yield statistically significant differences (all P ≥ 0.05), likely reflecting the small absolute ΔC-index values (0.001–0.006) and the inherent difficulty of detecting such small discrimination differences with moderate sample sizes, particularly in the T2D subgroup (n = 953, 248 events). Larger studies are needed to confirm whether these directional trends represent clinically meaningful differences in predictive performance.
