# Supplementary material
Source: Research Square preprint supplement (doi:10.21203/rs.3.rs-8922730/v1)
Supplement: Supplementary file 6 [file f5f50a204b6925240dfc3c5f.xlsx]

## Sheet: Table S2
Supplementary Table S2. Comparison of Baseline Characteristics Between Included and Excluded Participants
Variable	Included (n=6,993)	Excluded (n=10,714)	P-value	SMD
Demographics
Age, years (mean ± SD)	58.8 ± 9.6	59.2 ± 10.5	0.286	0.044
Age ≥60 years, n (%)	3,021 (43.2)	4,648 (43.6)	0.602	0.008
Female, n (%)	3,769 (53.9)	5,452 (51.0)	<0.001	0.059
Education level, n (%)			<0.001	0.194
Illiterate	2,061 (29.5)	2,742 (25.7)
Primary school	2,850 (40.8)	4,102 (38.5)
Middle school	1,391 (19.9)	2,261 (21.2)
High school	485 (6.9)	903 (8.5)
College or above	204 (2.9)	654 (6.1)
Married/cohabiting, n (%)	6,168 (88.2)	9,249 (86.6)	0.002	0.049
Rural residence, n (%)	5,780 (82.9)	7,573 (70.8)	<0.001	0.287
Lifestyle Factors
Smoking status, n (%)			<0.001	0.075
Never	4,309 (61.8)	6,319 (63.6)
Former	549 (7.9)	868 (8.7)
Current	2,111 (30.3)	2,751 (27.7)
Drinking status, n (%)			0.131	0.043
Never	4,975 (71.2)	7,662 (72.5)
Former	214 (3.1)	326 (3.1)
Current	1,798 (25.7)	2,577 (24.4)
Clinical Characteristics
Self-reported hypertension, n (%)	1,447 (20.8)	2,837 (27.0)	<0.001	0.144
Lung disease, n (%)	614 (8.8)	1,167 (11.1)	<0.001	0.075
Liver disease, n (%)	252 (3.6)	424 (4.0)	0.193	0.021
Digestive disease, n (%)	1,581 (22.7)	2,321 (22.0)	0.260	0.018
Lipid-lowering medication, n (%)	223 (3.2)	557 (5.2)	<0.001	0.100
Baseline heart disease, n (%)	0 (0.0)	2,093 (19.5)	—	—
Baseline stroke, n (%)	0 (0.0)	413 (3.9)	—	—
Anthropometric & Laboratory Measures†
BMI, kg/m²	23.33 ± 3.63	23.55 ± 3.95 (n=6,584)	0.007	0.058
WHtR	0.5381 ± 0.0648	0.5429 ± 0.0693 (n=6,406)	<0.001	0.072
FPG, mg/dL	107.94 ± 31.66	113.85 ± 44.30 (n=4,643)	<0.001	0.159
HbA1c, %	5.26 ± 0.78	5.27 ± 0.88 (n=4,767)	0.034	0.011
TG, mg/dL	121.77 ± 71.72	154.62 ± 148.43 (n=4,663)	<0.001	0.301
CRP, mg/L	1.55 ± 1.63	4.67 ± 11.65 (n=4,671)	<0.001	0.418
HDL-C, mg/dL	52.15 ± 15.07	48.89 ± 15.50 (n=4,670)	<0.001	0.214
LDL-C, mg/dL	118.19 ± 34.11	112.69 ± 35.82 (n=4,649)	<0.001	0.158
eGFR, mL/min/1.73m²	92.42 ± 14.49	91.02 ± 16.23 (n=4,608)	<0.001	0.092
SMD interpretation: Red (>0.2) = notable imbalance; Yellow (0.1–0.2) = small; White (<0.1) = negligible.
† Laboratory measures available for subset of excluded participants; n shown in parentheses.
Baseline heart disease and stroke are exclusion criteria; SMD not computed.
P-values: continuous variables by Mann–Whitney U test; categorical variables by χ² test.
Current smoking was defined as currently smoking at the time of the baseline survey (CHARLS items da059 and da061), encompassing both daily and occasional smokers. For categorical variables with missing data in the excluded group, percentages were calculated using non-missing observations as the denominator.
